# Supplementary material for: Structure and thermodynamics of a UGG motif interacting with Ba2+ and other metal ions: accommodating changes in the RNA structure and the presence of a G(syn)–G(syn) pair
Source: PubMed Central journal article supplement — RNA. 2023 Jan;29(1):44–54. doi: 10.1261/rna.079414.122 (PMC9808570; doi:10.1261/rna.079414.122), 2023-01
Supplement: supp_079414.122_Supplemental_Material.pdf [file supp_079414.122_Supplemental_Material.pdf]

## **Supplemental Material**

**to**

### **Structure and thermodynamics of a UGG motif interacting with Ba<sup>2+</sup> and other metal ions: accommodating changes in the RNA structure and the presence of a G(syn)–G(syn) pair.**

\*Agnieszka Kiliszek, Martyna Pluta, Magdalena Bejger, \*Wojciech Rypniewski

*Institute of Bioorganic Chemistry, Polish Academy of Sciences, Noskowskiego 12/14,  
61-704 Poznan, Poland*

*\*Corresponding authors: Agnieszka Kiliszek, [kiliszek@ibch.poznan.pl](mailto:kiliszek@ibch.poznan.pl), Wojciech Rypniewski, [wojtekr@ibch.poznan.pl](mailto:wojtekr@ibch.poznan.pl)*

**Table S1.** X-ray data and refinement statistics.

|                                         | RNA-Ba(1)                | RNA-Ba(2)                                         | RNA unliganded                                     | RNA-Cs                          | RNA-Sr                          | RNA-Cd                          | RNA-Ca                          |
|-----------------------------------------|--------------------------|---------------------------------------------------|----------------------------------------------------|---------------------------------|---------------------------------|---------------------------------|---------------------------------|
| <b>Data collection</b>                  |                          |                                                   |                                                    |                                 |                                 |                                 |                                 |
| Space group                             | P6 <sub>5</sub> 22       | P4 <sub>3</sub> 2 <sub>1</sub> 2                  | R3                                                 | P2 <sub>1</sub>                 | P2 <sub>1</sub>                 | P2 <sub>1</sub>                 | P2 <sub>1</sub>                 |
| Cell parameters (Å, °)                  | a=b=84.0 c=139.0         | a=b=34.1 c= 81.3                                  | a=b=49.2 c=69.8                                    | a=28.1 b=91.3<br>c=139.5 β=91.4 | a=28.2 b=90.6<br>c=139.6 β=91.4 | a=28.1 b=91.1<br>c=138.1 β=91.5 | a=28.1 b=90.3<br>c=138.2 β=91.4 |
| Resolution (Å)                          | 2.26                     | 1.79                                              | 2.02                                               | 2.86                            | 2.46                            | 2.75                            | 2.85                            |
| R <sub>merge</sub>                      | 0.062 (0.702)            | 0.090 (0.816)                                     | 0.061 (0.722)                                      | 0.080 (1.580)                   | 0.044 (0.893)                   | 0.045(0.703)                    | 0.074 (0.893)                   |
| I/σ                                     | 14.73 (1.93)             | 11.49(1.89)                                       | 16.78(1.88)                                        | 8.51 (0.80)                     | 14.36 (1.27)                    | 16.31 (1.63)                    | 14.48 (1.95)                    |
| CC <sub>1/2</sub>                       | 99.9 (61.9)              | 99.8 (72.5)                                       | 99.9 (73.7)                                        | 99.9 (52.7)                     | 99.9 (59.1)                     | 99.9 (73.1)                     | 99.9 (76.6)                     |
| Completeness (%)                        | 99.8 (99.9)              | 99.7(98.6)                                        | 99.8 (99.5)                                        | 96.4 (90.3)                     | 99.1.0(99.0)                    | 98.6 (97.4)                     | 99.5 (99.5)                     |
| Redundancy                              | 3.9 (3.9)                | 4.6 (4.6)                                         | 5.6 (4.3)                                          | 3.5 (3.6)                       | 3.5 (3.6)                       | 3.8 (3.7)                       | 6.9 (7.0)                       |
| No. of unique reflections               | 25605 (unmerged)         | 8634 (unmerged)                                   | 4105                                               | 30808<br>(unmerged)             | 48753<br>(unmerged)             | 18088                           | 16139                           |
| <b>Refinement</b>                       |                          |                                                   |                                                    |                                 |                                 |                                 |                                 |
| Overall mean B-factor (Å <sup>2</sup> ) | 47.65                    | 27.47                                             | 44.3                                               | 93.02                           | 96.65                           | 91.89                           | 90.26                           |
| Number of reflections: work/test        | 24317/1274               | 8201/428                                          | 3686/410                                           | 28808/1828                      | 44744/3910<br>(unmerged)        | 16240/1789                      | 15145/962                       |
| R <sub>work</sub> /R <sub>free</sub>    | 19.09/24.04              | 18.25/23.61                                       | 19.7/24.3                                          | 22.1/26.9                       | 19.92/24.78                     | 21.85/26.66                     | 20.77/26.60                     |
| RNA atoms                               | 2326                     | 403                                               | 380                                                | 5343                            | 5366                            | 5320                            | 5320                            |
| Water molecules                         | 66                       | 43                                                | 21                                                 | none                            | 12                              | 1                               | 3                               |
| No. ligands                             | 12 Ba <sup>2+</sup> ions | 2 Ba <sup>2+</sup> ions and 1 Na <sup>+</sup> ion | 1 acetate and 4 SO <sub>4</sub> <sup>2-</sup> ions | 28 of Cs <sup>+</sup> ions      | 22 Sr <sup>2+</sup> ions        | 3 Cd <sup>2+</sup> ions         | none                            |
| RMSD in bonds (Å)                       | 0.006                    | 0.005                                             | 0.007                                              | 0.002                           | 0.006                           | 0.002                           | 0.001                           |
| RMSD in angles (°)                      | 1.062                    | 0.93                                              | 0.92                                               | 0.465                           | 1.085                           | 0.479                           | 0.460                           |
| PDB code                                | 8AMG                     | 8AMI                                              | 8AMJ                                               | 8AMM                            | 8AMN                            | 8AML                            | 8AMK                            |
| DOI of raw images                       | 10.18150/<br>TGVVHI      | 10.18150/<br>LRK0NW                               | 10.18150/4UIWH<br>U                                | 10.18150/<br>YJBZDE             | 10.18150/<br>FO5TNS             | 10.18150/<br>VRMIWO             | 10.18150/<br>FOPWWU             |

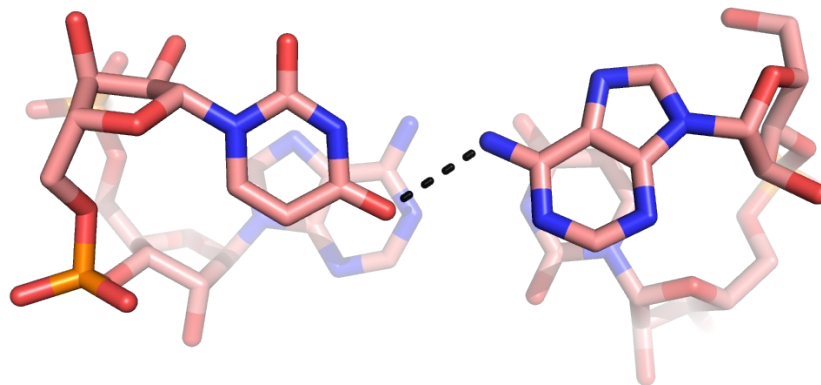

**Figure S1.** The noncanonical U•A pair of CD duplex in the RNA-Ba(1) structure. The 9U nucleotide is flipped in a way that the sugar moiety is rotated half a turn and the direction of the main chain is reversed. The uracyl ring still stacks with the neighboring 8A residue and interacts *via* the O6 carbonyl with the *exo*-amino group of 1A of chain C (H bond marked in black). According to Leontis and Westhof nomenclature the U-A pair forms *trans* WC-WC pair ([10.1017/s1355838201002515](https://doi.org/10.1017/s1355838201002515)).

## OMIT MAPS

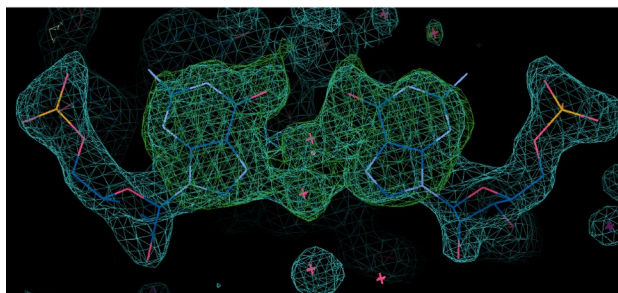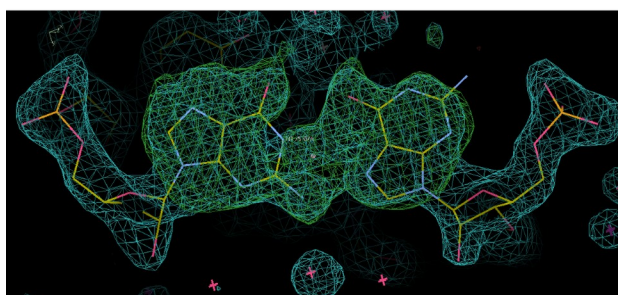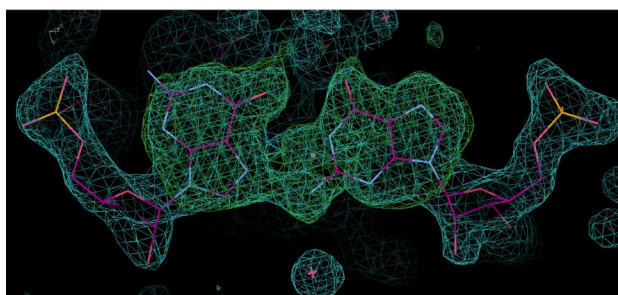

## 2Fo-Fc MAPS

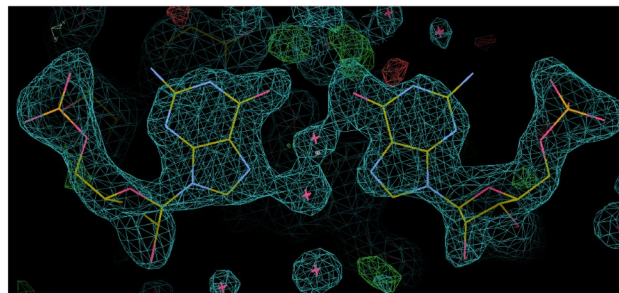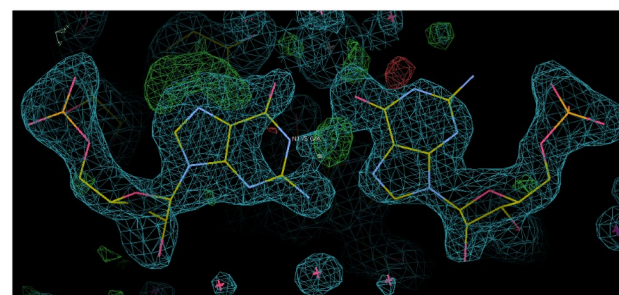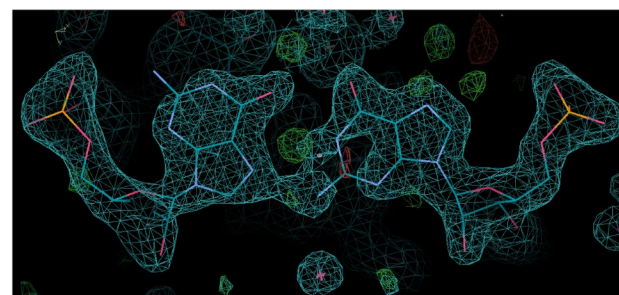

**Figure S2.** The electron density map analysis of G(syn)-G(syn) pair observed in the structure of RNA-Ba(2). On the left panel the guanosine residues are modeled into omit map (green) in three different arrangements: G(*syn*)-G(*syn*), G(*anti*)-G(*syn*), G(*syn*)-G(*anti*). The right panel represents the calculated 2F<sub>o</sub>-F<sub>c</sub> electron density maps for each G-G arrangement. The omit maps were contoured at 3σ level while the 2F<sub>o</sub>-F<sub>c</sub> electron density maps (blue) were contoured at 1σ level.

UGG Ba(2) model chains G and H

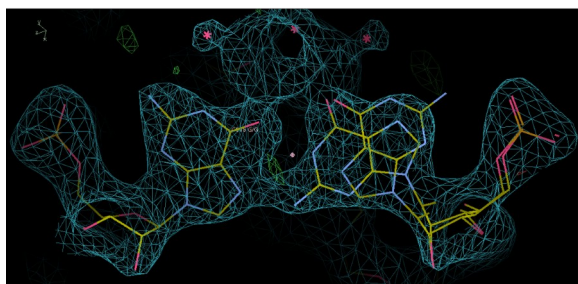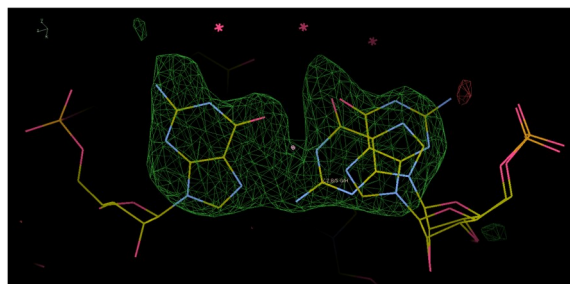

UGG Ba(2) model chains I and J

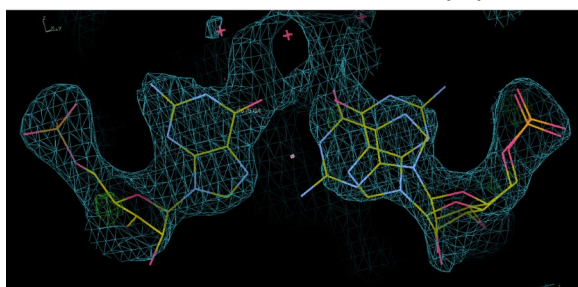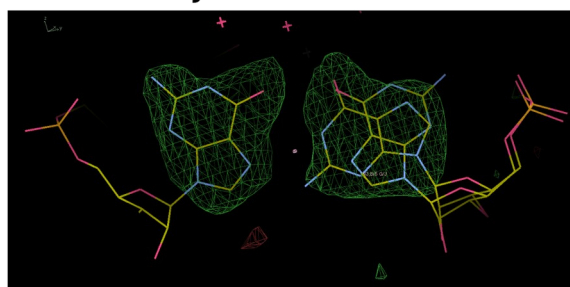

UGG Cs model chains Q and R

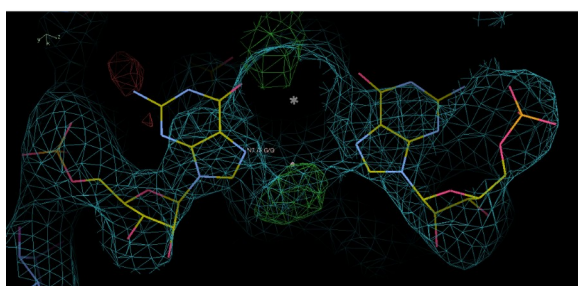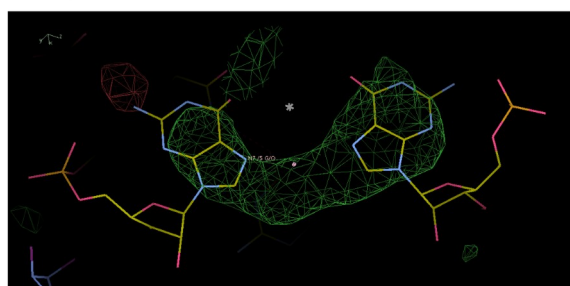

UGG Cs model chains S and T

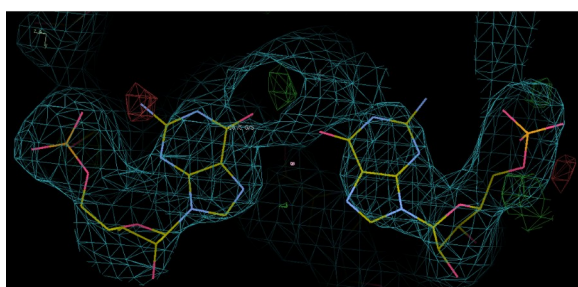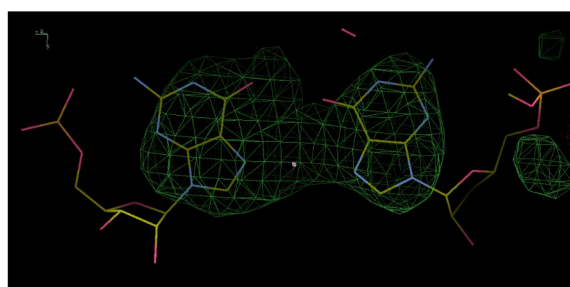

UGG Cs model chains Y and Z

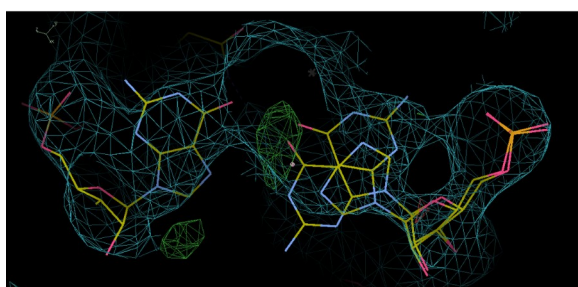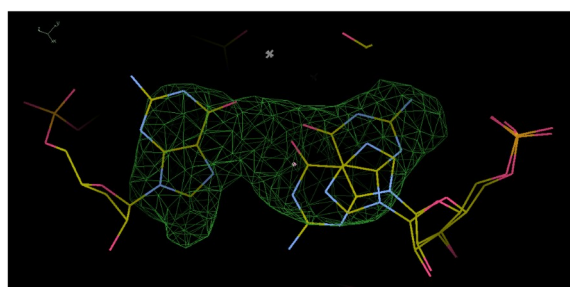

**Figure S3.** The  $2F_o-F_c$  (left panel; blue) and omit maps (right panel; green) calculated for G-G pairs. The omit maps were contoured at  $3\sigma$  level while the  $2F_o-F_c$  electron density maps were contoured at  $1\sigma$  level.

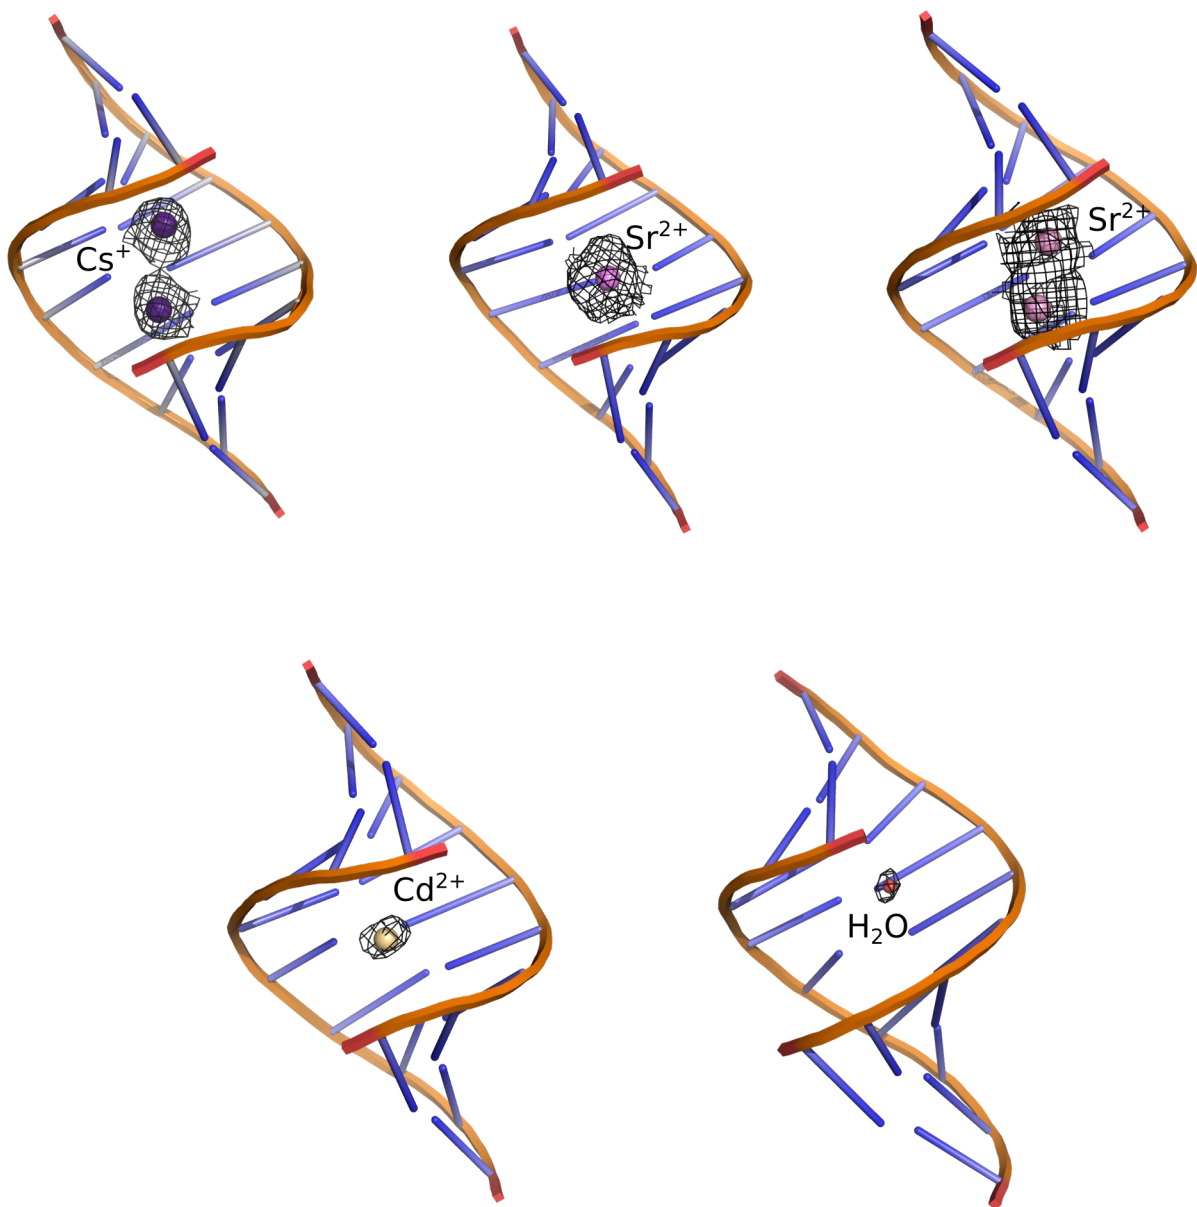

**Figure S4.** Cartoon representation of AUGUGGCAU models with bound metal ions in the major groove. The  $2F_o - F_c$  electron density map (gray) was contoured at  $1\sigma$  level. Sphere represents metal ions. The structure with water molecule was obtained in the presence of  $\text{Ca}^{2+}$  ions. The relatively low electron density for  $\text{Cd}^{2+}$  probably indicates its partial occupancy or disorder.

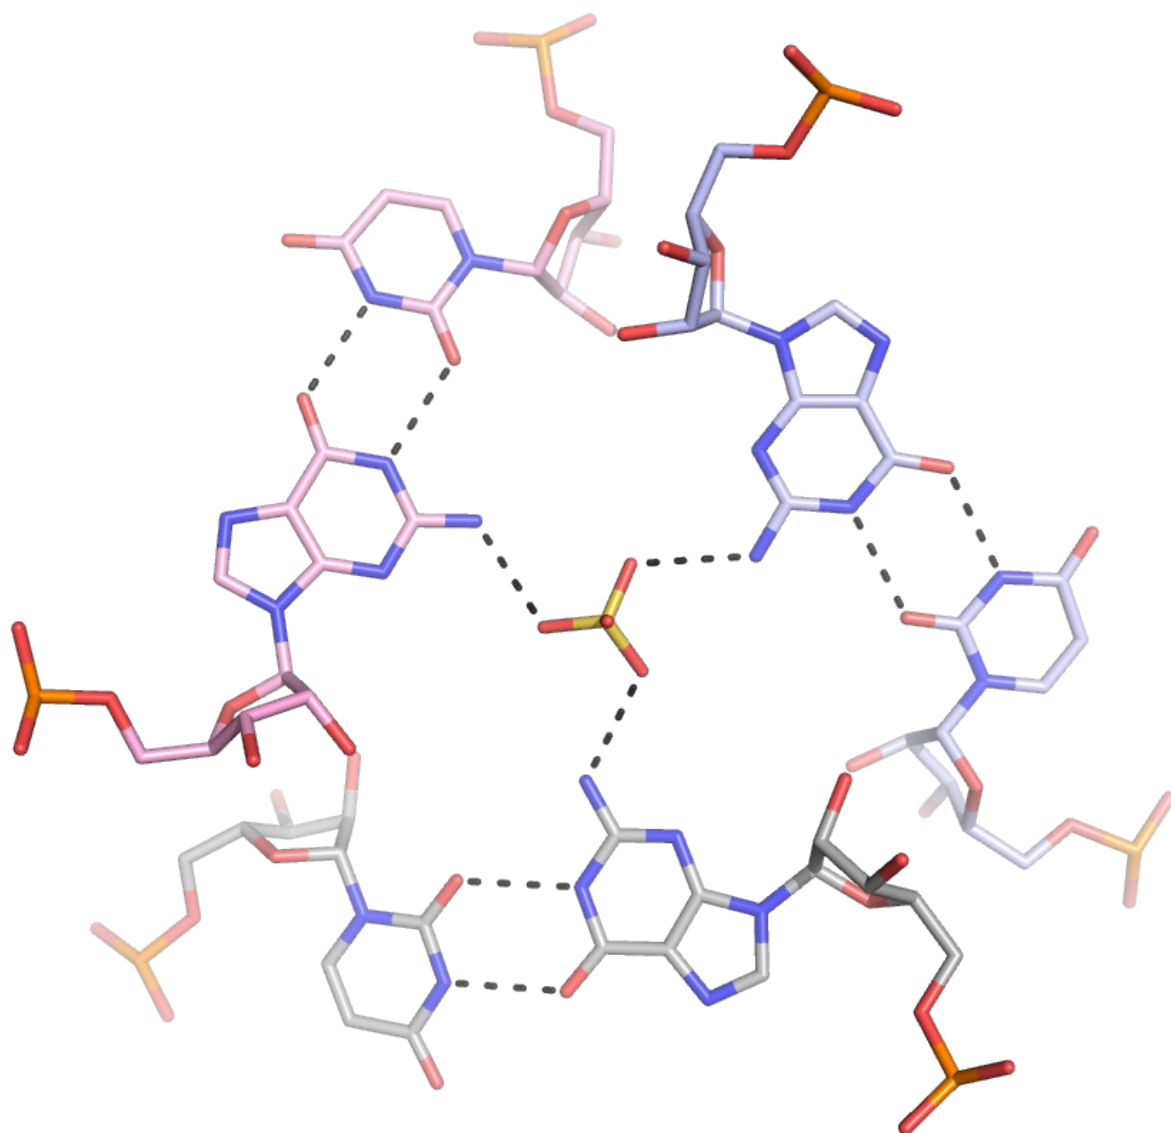

**Figure S5.** Interactions of sulfate ion with *exo*-amino groups of guanosine residues associated with U·G pairs. The sulfate ion is located on the three-fold axis and interacts with three symmetry-related RNA chains. The hydrogen bonds are dash-lines.

**Table S2.** Shear (in Å) calculated using 3DNA.**Shear parameter based on RC8--YC6 vectors**

| structure     |                      | RNA-Ba(1)    |              |              |              |             |              | RNA-Ba(2)   | unliganded   | RNA-Sr       |              |              |              |              |              |              |
|---------------|----------------------|--------------|--------------|--------------|--------------|-------------|--------------|-------------|--------------|--------------|--------------|--------------|--------------|--------------|--------------|--------------|
| chain ID      |                      | AB           | CD           | EF           | GH           | IJ          | KL           | AB          | AB           | AB           | CD           | EF           | GH           | IJ           | KL           | MN           |
| No. base pair |                      |              |              |              |              |             |              |             |              |              |              |              |              |              |              |              |
| 1             | A-U                  | -0.03        | -3.12        | -0.33        | -0.26        | 0.11        | -0.21        | -0.05       | -0.32        | -0.47        | -0.09        | -0.38        | -0.92        | -0.16        | -0.28        | 0.24         |
| 2             | U-A                  | 0.08         | -0.09        | 0.24         | 0.02         | 0.41        | 0.35         | -0.03       | 0.11         | -0.25        | -0.20        | 0.12         | 0.66         | 0.12         | -0.21        | -0.30        |
| 3             | G-C                  | -0.05        | -0.39        | -0.06        | -0.08        | 0.23        | -0.08        | -0.24       | -0.33        | -0.04        | -0.07        | -0.20        | -0.09        | -0.68        | -0.33        | 0.20         |
| 4             | U-G                  | 2.31         | 2.62         | 2.23         | 2.22         | 2.01        | 2.25         | 2.16        | 2.47         | 2.07         | 2.19         | 2.60         | 2.36         | 2.09         | 2.16         | 2.32         |
| 5             | G-G                  | -2.88        | -2.62        | -2.83        | -2.52        | -0.00       | -2.32        | -0.01       | -2.61        | -2.96        | -2.47        | -2.55        | -2.57        | -2.32        | -2.48        | -2.90        |
| 6             | G-U                  | -1.97        | -2.74        | -2.13        | -2.45        | -2.19       | -2.25        | -2.13       | -2.26        | -2.05        | -2.32        | -2.44        | -2.19        | -2.29        | -2.48        | -2.20        |
| 7             | C-G                  | 0.16         | -0.10        | -0.03        | 0.25         | 0.24        | -0.49        | 0.23        | 0.36         | 0.27         | 0.24         | 0.09         | 0.18         | 0.34         | -0.10        | 0.07         |
| 8             | A-U                  | 0.52         | -0.27        | -0.50        | -0.41        | -0.45       | -0.01        | 0.09        | 0.15         | 0.11         | 0.67         | 0.24         | 0.11         | 0.63         | 0.28         | -0.22        |
| 9             | U-A                  | -0.14        | -0.03        | 0.21         | -0.04        | 0.38        | 0.04         | 0.25        | 0.56         | 0.43         | 0.10         | -0.08        | -0.19        | 0.38         | 0.24         | 0.52         |
|               | <b>average value</b> | <b>-0.22</b> | <b>-0.75</b> | <b>-0.36</b> | <b>-0.36</b> | <b>0.08</b> | <b>-0.30</b> | <b>0.03</b> | <b>-0.21</b> | <b>-0.32</b> | <b>-0.05</b> | <b>-0.29</b> | <b>-0.29</b> | <b>-0.21</b> | <b>-0.36</b> | <b>-0.25</b> |
|               | <b>s.d.</b>          | <b>1.48</b>  | <b>1.81</b>  | <b>1.45</b>  | <b>1.43</b>  | <b>1.09</b> | <b>1.38</b>  | <b>1.08</b> | <b>1.51</b>  | <b>1.45</b>  | <b>0.85</b>  | <b>1.53</b>  | <b>1.48</b>  | <b>1.40</b>  | <b>1.42</b>  | <b>1.52</b>  |

**Table S3.** Shift (in Å) calculated using 3DNA.**Shift parameter based on consecutive C1'-C1' vectors**

| structure          |                      | RNA-Ba(1)    |              |             |              |              |             | RNA-Ba(2)   | unliganded   | RNA-Sr       |              |              |              |              |             |              |
|--------------------|----------------------|--------------|--------------|-------------|--------------|--------------|-------------|-------------|--------------|--------------|--------------|--------------|--------------|--------------|-------------|--------------|
| chain ID           |                      | AB           | CD           | EF          | GH           | IJ           | KL          | AB          | AB           | AB           | CD           | EF           | GH           | IJ           | KL          | MN           |
| No. base pair step |                      |              |              |             |              |              |             |             |              |              |              |              |              |              |             |              |
| 1                  | AU/AU                | -0.30        | -0.77        | -0.29       | -0.63        | -0.75        | -0.28       | -0.30       | 0.21         | -0.74        | -0.33        | 0.25         | 0.14         | 0.24         | -0.34       | -0.69        |
| 2                  | UG/CA                | 0.44         | 0.83         | 0.78        | 0.70         | 0.50         | 1.10        | 0.64        | -0.60        | 0.37         | 0.11         | -0.08        | -0.35        | -0.01        | 0.19        | 0.72         |
| 3                  | GU/GC                | 0.18         | 0.49         | 0.15        | 0.26         | 0.55         | -0.01       | 0.08        | -0.09        | 0.33         | 0.36         | -0.17        | 0.10         | 0.16         | -0.00       | 0.05         |
| 4                  | UG/GG                | 1.17         | 1.70         | 1.82        | 1.44         | 2.45         | 2.24        | 2.61        | 0.71         | 1.66         | 1.16         | 1.27         | 1.76         | 1.48         | 2.02        | 1.35         |
| 5                  | GG/UG                | -1.95        | -1.37        | -1.27       | -1.97        | -2.60        | -1.63       | -2.60       | -2.96        | -2.22        | -1.86        | -2.39        | -1.57        | -1.46        | -1.19       | -1.84        |
| 6                  | GC/GU                | -0.01        | -0.37        | -0.11       | 0.26         | -0.18        | -0.34       | 0.02        | -0.29        | -0.21        | -0.03        | -0.33        | -0.25        | 0.03         | -0.31       | -0.14        |
| 7                  | CA/UG                | -0.54        | -0.52        | -0.41       | -0.41        | -0.72        | -0.46       | 0.06        | 0.39         | -0.52        | -0.07        | -0.16        | -0.11        | -0.23        | -0.21       | -0.07        |
| 8                  | AU/AU                | 0.94         | -0.04        | 0.34        | 0.12         | 0.39         | 0.27        | -0.10       | 0.07         | -0.24        | 0.25         | -0.06        | -0.26        | -0.34        | 0.02        | -0.23        |
|                    | <b>average value</b> | <b>-0.01</b> | <b>-0.01</b> | <b>0.13</b> | <b>-0.03</b> | <b>-0.04</b> | <b>0.11</b> | <b>0.05</b> | <b>-0.32</b> | <b>-0.20</b> | <b>-0.05</b> | <b>-0.21</b> | <b>-0.07</b> | <b>-0.02</b> | <b>0.02</b> | <b>-0.11</b> |
|                    | <b>s.d.</b>          | <b>0.98</b>  | <b>0.98</b>  | <b>0.91</b> | <b>1.01</b>  | <b>1.44</b>  | <b>1.15</b> | <b>1.42</b> | <b>1.14</b>  | <b>1.10</b>  | <b>0.85</b>  | <b>1.01</b>  | <b>0.91</b>  | <b>0.81</b>  | <b>0.91</b> | <b>0.94</b>  |



**Table S4.** Helical twist (in degree) calculated using 3DNA.

Twist parameter based on consecutive C1'-C1' vectors

| No. base pair step | structure     | RNA-Ba(1) |       |       |       |       |       | RNA-Ba(2) | unliganded | RNA-Sr |       |       |       |       |       |       |
|--------------------|---------------|-----------|-------|-------|-------|-------|-------|-----------|------------|--------|-------|-------|-------|-------|-------|-------|
|                    | chain ID      | AB        | CD    | EF    | GH    | IJ    | KL    | AB        | AB         | AB     | CD    | EF    | GH    | IJ    | KL    | MN    |
| 1                  | AU/AU         | 34.7      | 0.85  | 30.45 | 33.38 | 34.7  | 34.21 | 33.92     | 33.64      | 31.44  | 33.37 | 31.68 | 33.73 | 33.59 | 35.51 | 32.36 |
| 2                  | UG/CA         | 37.55     | 34.51 | 33.75 | 34.02 | 33.52 | 35.8  | 35.4      | 32.85      | 34.18  | 36    | 35.74 | 33.67 | 35.27 | 34.85 | 36.22 |
| 3                  | GU/GC         | 31.72     | 33.76 | 34.93 | 32.22 | 38.09 | 33.85 | 34.81     | 25.59      | 30.25  | 30.35 | 26.57 | 32.1  | 28.95 | 29.12 | 26.89 |
| 4                  | UG/GG         | 34.15     | 32.28 | 32.82 | 42.28 | 34.07 | 32.96 | 35.56     | 38.5       | 35.55  | 40.77 | 33.77 | 36.76 | 37.37 | 34.57 | 39.87 |
| 5                  | GG/UG         | 32.46     | 38.26 | 40.57 | 29.26 | 36.03 | 38.16 | 36.82     | 31.59      | 34     | 33.62 | 36.11 | 33.61 | 30.33 | 40.72 | 35.18 |
| 6                  | GC/GU         | 34.62     | 29.98 | 31.41 | 33.2  | 34.2  | 36.3  | 33.33     | 29.49      | 29.35  | 31.45 | 28.36 | 30.86 | 28.22 | 28.37 | 30.13 |
| 7                  | CA/UG         | 33.28     | 35.36 | 37.21 | 36.35 | 37.34 | 36.39 | 32.06     | 32.99      | 33.76  | 35.57 | 33.21 | 33.73 | 33.66 | 32.23 | 31.07 |
| 8                  | AU/AU         | 33.91     | 34.08 | 33.32 | 34.56 | 31.92 | 35.37 | 34.88     | 32.8       | 32.6   | 34.09 | 32.78 | 32.19 | 32    | 33.71 | 36.75 |
|                    | average value | 34.05     | 34.03 | 34.31 | 34.41 | 34.98 | 35.38 | 34.60     | 32.18      | 32.64  | 34.40 | 32.28 | 33.33 | 32.42 | 34.28 | 33.91 |
|                    | s.d.          | 1.76      | 2.56  | 3.27  | 3.77  | 2.05  | 1.66  | 1.47      | 3.68       | 2.14   | 3.19  | 3.34  | 1.74  | 3.16  | 3.72  | 4.41  |

**Table S5.** Propeller (in degree) calculated using 3DNA.

Propeller parameter based on RC8--YC6 vectors

| No. base pair | structure     | RNA-Ba(1) |        |        |        |        |        | RNA-Ba(2) | unliganded | RNA-Sr |        |        |        |        |        |        |
|---------------|---------------|-----------|--------|--------|--------|--------|--------|-----------|------------|--------|--------|--------|--------|--------|--------|--------|
|               | chain ID      | AB        | CD     | EF     | GH     | IJ     | KL     | AB        | AB         | AB     | CD     | EF     | GH     | IJ     | KL     | MN     |
| 1             | A-U           | -13.91    | -26.05 | -13.34 | -10.88 | -21.36 | -22.39 | -9.76     | -9.70      | -0.52  | -12.53 | -14.02 | -7.96  | -12.00 | -11.54 | -8.11  |
| 2             | U-A           | -16.81    | -13.58 | -19.82 | -14.46 | -19.65 | -21.05 | -16.23    | -15.49     | -14.03 | -16.63 | -17.66 | -12.90 | -19.68 | -22.43 | -20.75 |
| 3             | G-C           | -18.79    | -22.28 | -19.40 | -17.11 | -18.91 | -34.17 | -23.50    | -15.59     | -19.73 | -20.38 | -13.44 | -17.20 | -22.39 | -23.32 | -18.50 |
| 4             | U-G           | -14.88    | -18.12 | -15.61 | -17.52 | -7.61  | -32.53 | -15.20    | -10.06     | -14.20 | -14.38 | -14.88 | -16.57 | -16.32 | -16.06 | -13.97 |
| 5             | G-G           | -17.15    | -22.22 | -21.18 | -20.39 | -20.30 | -25.02 | -21.40    | -11.77     | -13.07 | -16.71 | -23.85 | -15.75 | -14.87 | -18.25 | -17.83 |
| 6             | G-U           | -18.44    | -19.86 | -15.63 | -16.39 | -14.32 | -15.40 | -13.78    | -13.73     | -12.87 | -13.81 | -12.12 | -14.04 | -14.43 | -13.69 | -15.37 |
| 7             | C-G           | -23.65    | -20.15 | -23.71 | -19.20 | -22.15 | -20.57 | -21.39    | -21.43     | -18.76 | -17.95 | -17.09 | -22.53 | -19.25 | -18.38 | -15.55 |
| 8             | A-U           | -29.95    | -6.73  | -17.69 | -20.61 | -15.85 | -22.20 | -18.68    | -16.94     | -25.52 | -13.55 | -18.63 | -14.18 | -20.01 | -17.21 | -19.12 |
| 9             | U-A           | -11.39    | -14.96 | -18.75 | -15.28 | -17.88 | -13.86 | -12.34    | -11.38     | -13.83 | -5.98  | -9.19  | -12.00 | -5.72  | -10.20 | -15.40 |
|               | average value | -18.33    | -18.22 | -18.35 | -16.87 | -17.56 | -23.02 | -16.92    | -14.01     | -14.73 | -14.66 | -15.65 | -14.79 | -16.07 | -16.79 | -16.07 |
|               | s.d.          | 5.55      | 5.75   | 3.17   | 3.10   | 4.49   | 6.82   | 4.64      | 3.78       | 6.78   | 4.09   | 4.25   | 4.01   | 5.08   | 4.48   | 3.69   |

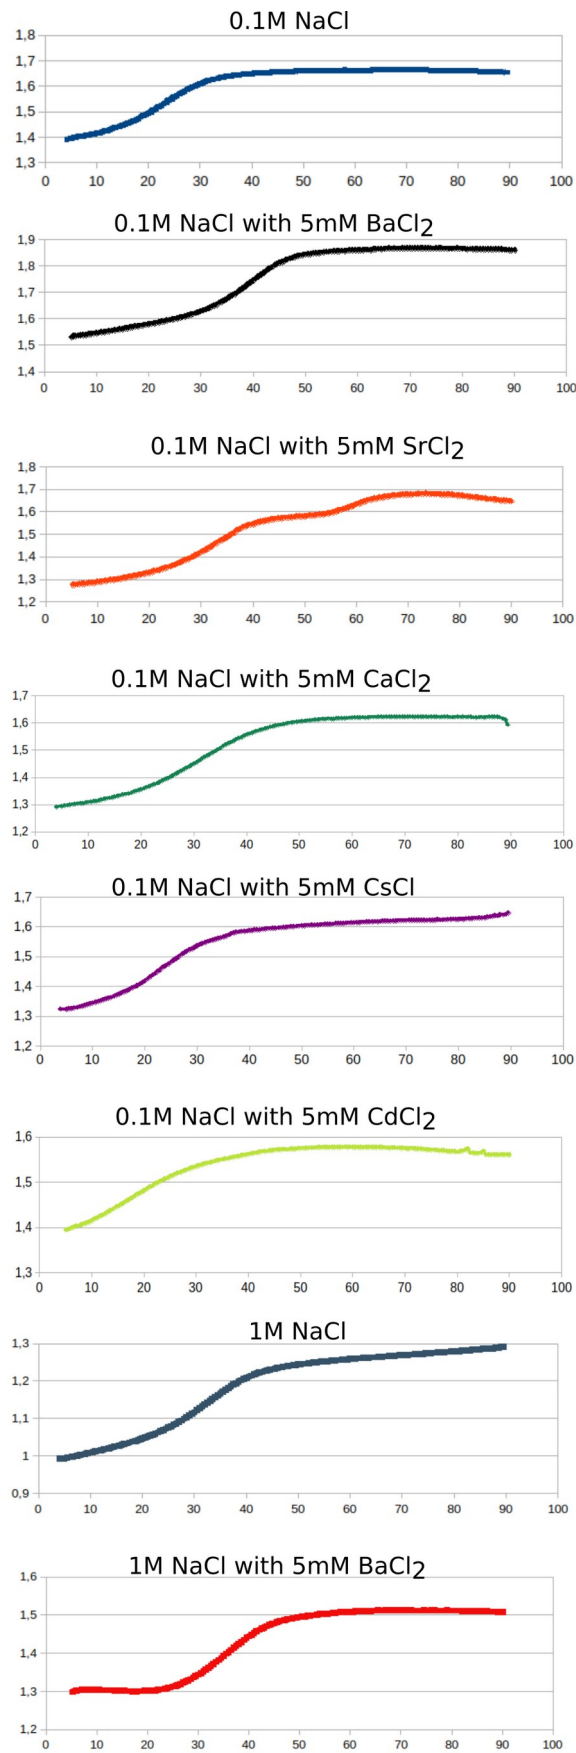

**Figure S6.** The representative absorbance curves, as a function of temperature (°C), for the AUGUGGCAU oligomer measured in different buffers.

**Table S6.** The melting temperature  $T_m$  of the AUGUGGCAU oligomer calculated for each cycle of DSC measurement and corresponding normalized DSC curves.

| Buffer    | Run number | RNA concentration ( $\mu\text{M}$ ) | $T_m1$ ( $^{\circ}\text{C}$ ) | $T_m2$ ( $^{\circ}\text{C}$ ) | $T_m3$ ( $^{\circ}\text{C}$ ) | DSC curves |
|-----------|------------|-------------------------------------|-------------------------------|-------------------------------|-------------------------------|------------|
| 0.1M NaCl | 1          | 298                                 | 24.58                         | 69.19                         | -                             |            |
|           | 2          | <298                                | 25.16                         | -                             | -                             |            |
|           | 3          | <<298                               | 24.89                         | -                             | -                             |            |
|           | 4          | <<<298                              | 24.76                         | -                             | -                             |            |
|           | 5          | <<<<298                             | 24.72                         | -                             | -                             |            |
|           | 6          | <<<<<298                            | 24.46                         | -                             | -                             |            |
| 1M NaCl   | 1          | 221                                 | 36.02                         | 62.23                         | -                             |            |
|           | 2          | <221                                | 35.55                         | -                             | -                             |            |
|           | 3          | <<221                               | 35.24                         | -                             | -                             |            |
|           | 4          | <<<221                              | 34.91                         | -                             | -                             |            |
|           | 5          | <<<<221                             | 34.39                         | -                             | -                             |            |

|                                      |   |            |              |       |       |                                                                                      |
|--------------------------------------|---|------------|--------------|-------|-------|--------------------------------------------------------------------------------------|
| 0.1M NaCl<br>+ 5mM CaCl <sub>2</sub> | 1 | <b>211</b> | <b>32.72</b> | 63.57 | -     | 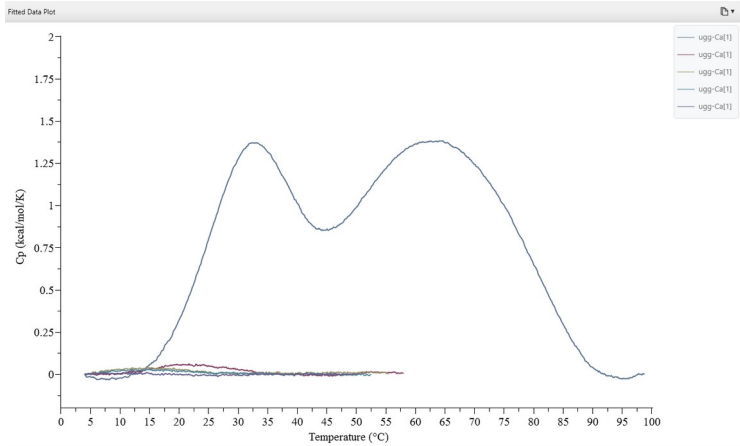  |
|                                      | 2 | <211       | -            | -     | -     |                                                                                      |
|                                      | 3 | <<211      | -            | -     | -     |                                                                                      |
|                                      | 4 | <<<211     | -            | -     | -     |                                                                                      |
|                                      | 5 | <<<<211    | -            | -     | -     |                                                                                      |
| 0.1M NaCl<br>+ 5mM SrCl <sub>2</sub> | 1 | <b>291</b> | <b>34.06</b> | 49.23 | 67,78 |  |
|                                      | 2 | <291       | 32.89        | -     | -     |                                                                                      |
|                                      | 3 | <<291      | 31.30        | -     | -     |                                                                                      |
|                                      | 4 | <<<291     | 28.87        | -     | -     |                                                                                      |
|                                      | 5 | <<<<291    | 28.31        | -     | -     |                                                                                      |

|                                      |   |         |       |       |   |
|--------------------------------------|---|---------|-------|-------|---|
| 0.1M NaCl<br>+ 5mM CdCl <sub>2</sub> | 1 | 160     | 21.80 | 71.81 | - |
|                                      | 2 | <160    | -     | -     | - |
|                                      | 3 | <<160   | -     | -     | - |
|                                      | 4 | <<<160  | -     | -     | - |
|                                      | 5 | <<<<160 | -     | -     | - |

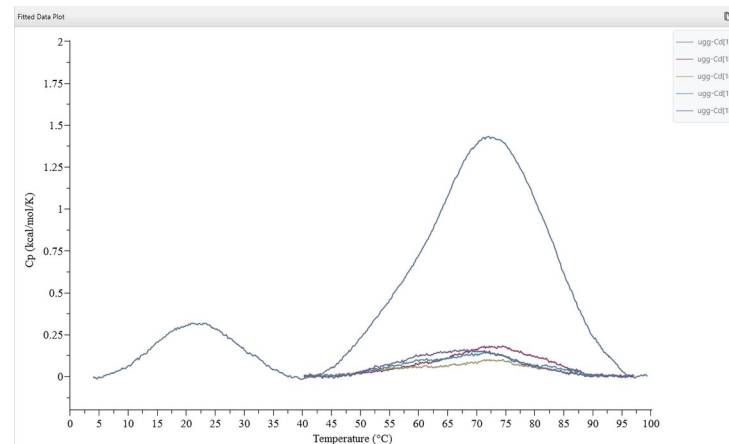

|                         |   |         |       |       |   |
|-------------------------|---|---------|-------|-------|---|
| 0.1M NaCl<br>+ 5mM CsCl | 1 | 251     | 23.55 | 65.61 | - |
|                         | 2 | <251    | 23.92 | -     | - |
|                         | 3 | <<251   | 23.68 | -     | - |
|                         | 4 | <<<251  | 23.37 | -     | - |
|                         | 5 | <<<<251 | 23.26 | -     | - |

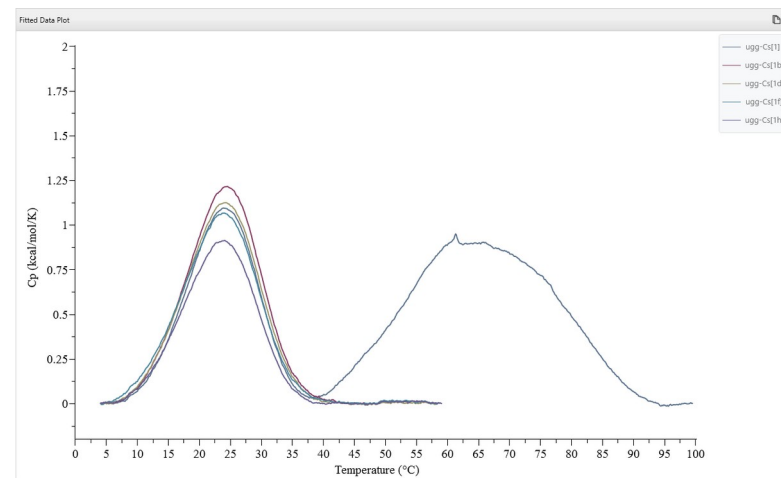

|                                      |   |          |       |       |   |
|--------------------------------------|---|----------|-------|-------|---|
| 0.1M NaCl<br>+ 5mM BaCl <sub>2</sub> | 1 | 260      | 40.58 | 74.66 | - |
|                                      | 2 | <260     | 40.12 | -     | - |
|                                      | 3 | <<260    | 39.13 | -     | - |
|                                      | 4 | <<<260   | 37.96 | -     | - |
|                                      | 5 | <<<<260  | 36.88 | -     | - |
|                                      | 6 | <<<<<260 | 36.73 | -     | - |

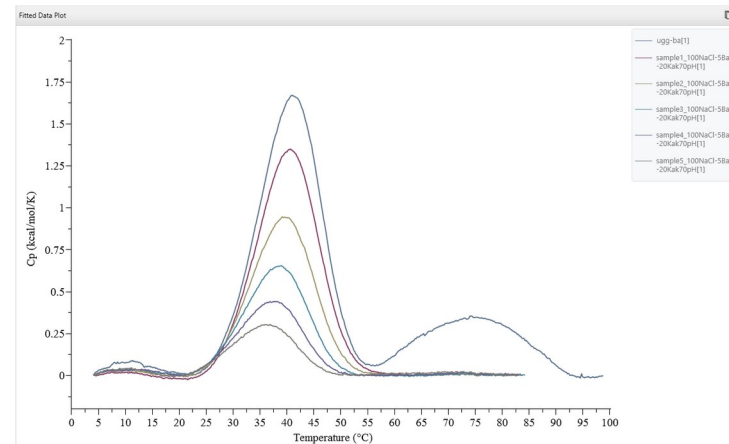

**Table S7.** Crystals structures of models containing G·U pairs with bound Ba<sup>2+</sup> ions.

| PDB code | Primary Citation                                                                                                                                                                                       | DOI                            |
|----------|--------------------------------------------------------------------------------------------------------------------------------------------------------------------------------------------------------|--------------------------------|
| 1KD4     | The Crystal Structure of r(GGUCACAGCCC) <sub>2</sub> , Barium form Kacer, V., Scaringe, S.A., Scarsdale, J.N., Rife, J.P. Acta Crystallogr., Sect. D 59 423-432 (2003)                                 | 10.1107/S0907444902021911      |
| 6H0R     | X-ray structure of SRS2 fragment of Rgs4 3' UTR Heber, S., Gaspar, I., Tants, J.N., Gunther, J., Moya, S.M.F., Janowski, R., Ephrussi, A., Sattler, M., Niessing, D. Nat Commun 10 1659-1659 (2019)    | 10.1038/s41467-019-09655-3     |
| 6CK5     | PRPP riboswitch from <i>T. mathranii</i> bound to PRPP Knappenberger, A.J., Reiss, C.W., Strobel, S.A. Elife 7 (2018)                                                                                  | 10.7554/eLife.36381            |
| 6CB3     | Crystal structure of the <i>L. Lactis</i> YkoY riboswitch bound to cadmium Bachas, S.T., Ferre-D'Amare, A.R. Cell Chem Biol 25 962-973.e5 (2018)                                                       | 10.1016/j.chembiol.2018.04.016 |
| 3F2W     | Crystal structure of the FMn riboswitch bound to FMN, Ba <sup>2+</sup> soak. Serganov, A., Huang, L., Patel, D.J. Nature 458 233-237 (2009)                                                            | 10.1038/nature07642            |
| 3OXJ     | Crystal structure of glycine riboswitch, soaked in Ba <sup>2+</sup> Huang, L., Serganov, A., Patel, D.J. Mol. Cell 40 774-786 (2010)                                                                   | 10.1016/j.molcel.2010.11.026   |
| 4AOB     | SAM-I riboswitch containing the <i>T. solenopsae</i> Kt-23 in complex with S-adenosyl methionine Schroeder, K.T., Daldrop, P., McPhee, S.A., Lilley, D.M.J. RNA 18 (2012)                              | 10.1261/RNA.032409.112         |
| 4Y1I     | <i>Lactococcus lactis</i> yybP-ykoY Mn riboswitch bound to Mn <sup>2+</sup> Price, I.R., Gaballa, A., Ding, F., Helmman, J.D., Ke, A. Mol. Cell 57 1110-1123 (2015)                                    | 10.1016/j.molcel.2015.02.016   |
| 5FJC     | SAM-I riboswitch bearing the <i>H. marismortui</i> Kt-7 variant C-2bU Huang, L., Wang, J., Lilley, D.M.J. Nucleic Acids Res. 44 (2016)                                                                 | 10.1093/NAR/GKW201             |
| 7OUO     | Crystal structure of RNA duplex [UCGUGC GA] <sub>2</sub> in complex with Ba <sup>2+</sup> cation Ruzkowska, A., Zheng, Y.Y., Mao, S., Ruzkowski, M., Sheng, J. Front Mol Biosci 8 762786-762786 (2021) | 10.3389/fmolb.2021.762786      |
| 4B5R     | SAM-I riboswitch bearing the <i>H. marismortui</i> K-t-7 Daldrop, P., Lilley, D.M.J. RNA 19 (2013)                                                                                                     | 10.1261/RNA.036657.112         |
